# Supplementary material for: CRISPR artificial splicing factors
Source: PubMed Central journal article supplement (PMC7293279; doi:10.1038/s41467-020-16806-4), 2020-06-12
Supplement: 41467_2020_16806_MOESM1_ESM.pdf [file 41467_2020_16806_MOESM1_ESM.pdf]

# **CRISPR Artificial Splicing Factors**

Supplementary Information

Du and Jillette *et al.*

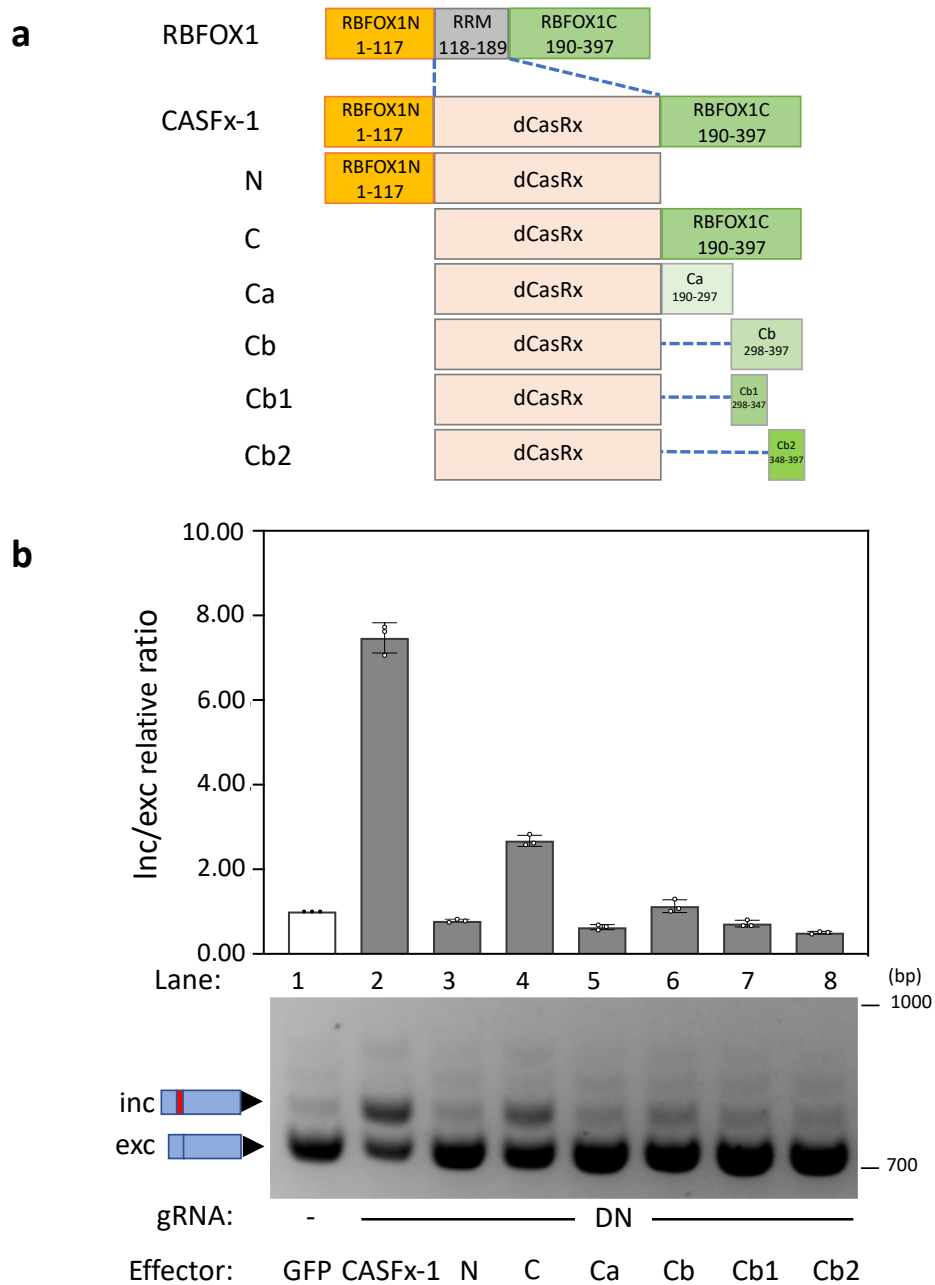

**Supplementary Fig 1.** Examining functional domains of RBFOX1 required for CASFx-1 splicing activity. (a) Diagrams of the RBFOX1, full length CASFx-1 (RBFOX1N-dCasRx-C) and RBFOX1 truncation mutants. (b) Upper panel shows inclusion/exclusion relative ratio fold-change assayed by qRT-PCR on *SMN2* minigene transcripts in cells co-transfected with control GFP plasmid (pmaxGFP), CASFx-1 (RBFOX1N-dCasRx-C) or

RBFOX1 truncation mutants, and the DN gRNAs, relative to that of the GFP control (set to 1). Data are represented as mean  $\pm$  SD (n = 3). Lower panel shows a gel image of semi-quantitative splicing RT-PCR in the corresponding samples. The image shown is representative of two independent experiments. Uncropped gel images and qRT-PCR values are included in Source Data file.

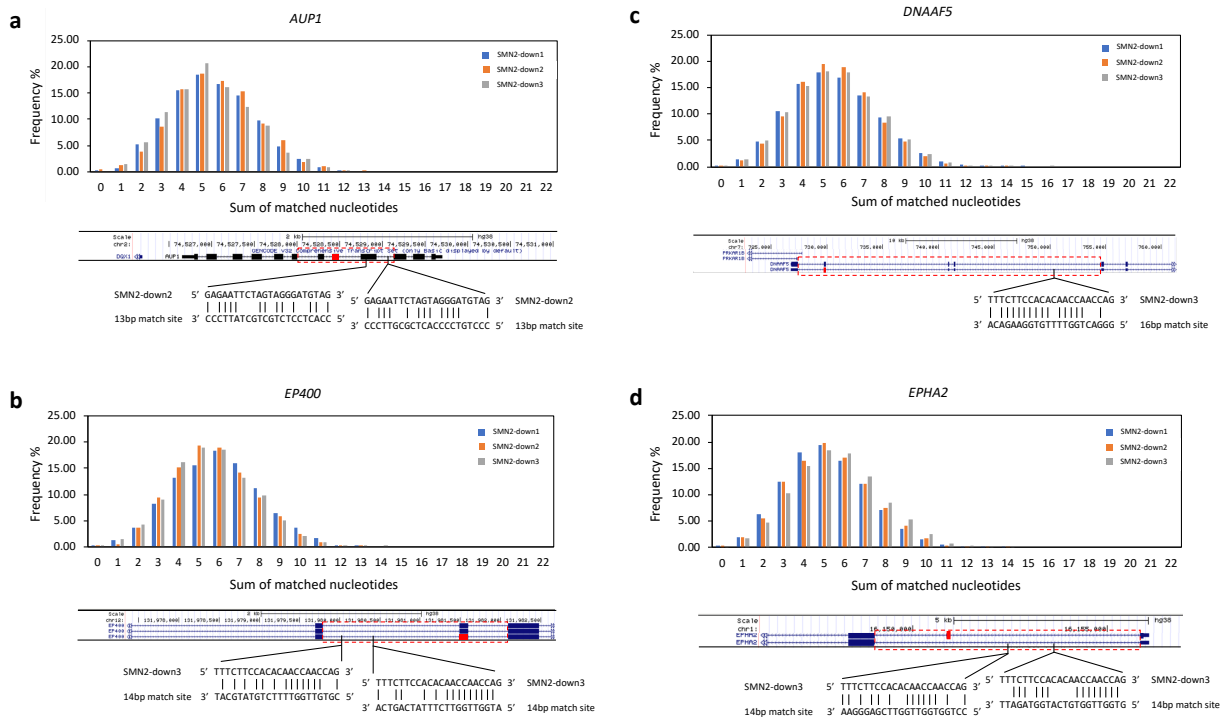

**Supplementary Fig 2.** Sequence match profiles of the off-target events induced by CASFx-1. To calculate the sum of matched nucleotides, three gRNA spacers were compared against a search window encompassing the upstream intron, cassette exon, and downstream intron of the off-target events (highlighted by the dotted rectangle). (a) Upper panel shows number of positions (y-axis) with the indicated number of matching nucleotides (x-axis) within the search window on *AUP1* for each *SMN2* gRNA. The bottom panel shows the two sites sharing 13 bp matched sequence between *SMN2-down2* and the intron region. The cassette exon is marked in red. (b) Upper panel shows number of positions (y-axis) with the indicated number of matching nucleotides (x-axis) within the search window on *EP400* for each *SMN2* gRNA. The bottom panel shows the two sites sharing 14 bp matched sequence between *SMN2-down3* and the intron region. The cassette exon is marked in red. (c) Upper panel shows number of positions (y-axis) with the indicated number of matching nucleotides (x-axis) within the

search window on *DNAAF5* for each *SMN2* gRNA. The bottom panel shows the site sharing a 16 bp matched sequence between *SMN2*-down3 and the intron region. The cassette exon is marked in red. (d) Upper panel shows number of positions (y-axis) with the indicated number of matching nucleotides (x-axis) within the search window on *EPHA2* for each *SMN2* gRNA. The bottom panel shows the two sites sharing 14 bp matched sequence between *SMN2*-down3 and the intron region. The cassette exon is marked in red.

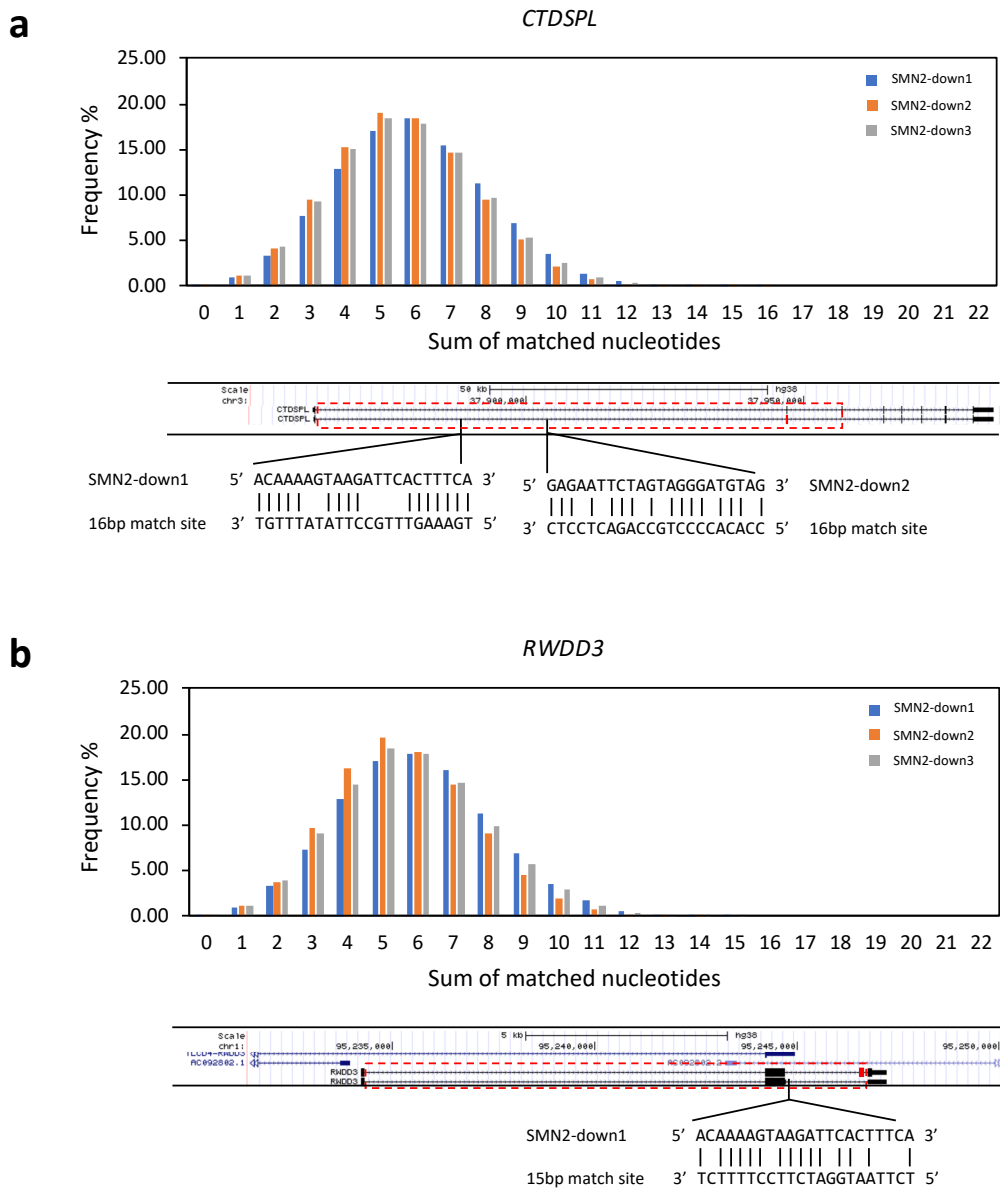

**Supplementary Fig 3.** Sequence match profiles of the off-target events induced by CASFx-3. To calculate the sum of matched nucleotides, three gRNA spacers were compared against a search window encompassing the upstream intron, cassette exon, and downstream intron of the off-target events (highlighted by the dotted rectangle). (a) Upper panel shows number of positions (y-axis) with the indicated number of matching nucleotides (x-axis) within the search window on *CTDSPL* for each *SMN2* gRNA. The

bottom panel shows the two sites sharing 16 bp matched sequence between SMN2-down1 or SMN2-down2 and the intron region. The cassette exon is marked in red. (b) Upper panel shows number of positions (y-axis) with the indicated number of matching nucleotides (x-axis) within the search window on *RWDD3* for each *SMN2* gRNA. The bottom panel shows the site sharing 15 bp matched sequence between SMN2-down1 and the intron region. The cassette exon is marked in red.

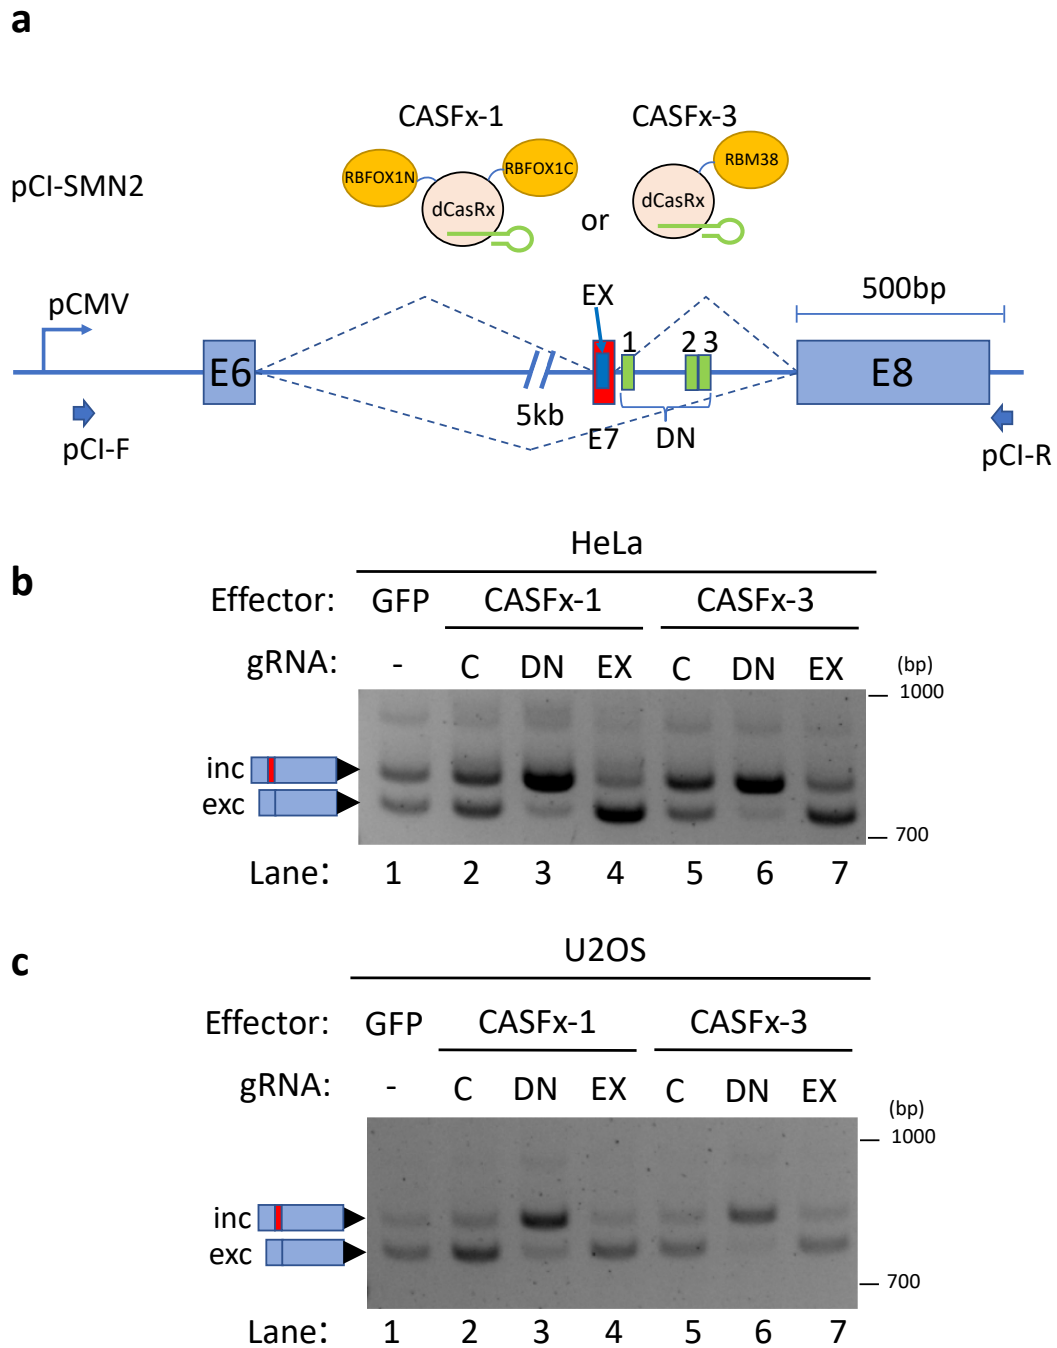

**Supplementary Fig 4.** Activation and repression of SMN2-E7 by differential positioning of CASFx in HeLa and U2OS cells. (a) Schematic of the CRISPR artificial splicing factors, CASFx-1 (RBFOX1N-dCasRx-C), CASFx-3 (dCasRx-RBM38) and SMN2 minigene, as well as a set of three target sites downstream of E7 (DN: gRNA-1 through



3) and one target site target within E7 (EX). (b) Gel image of semi-quantitative splicing RT-PCR of the corresponding transfected samples in HeLa cells. "C" indicates a control gRNA without matching *SMN2* minigene sequence. The image shown is representative of two independent experiments. (c) Gel image of semi-quantitative splicing RT-PCR of the corresponding transfected samples in U2OS cells. "C" indicates a control gRNA without matching *SMN2* minigene sequence. The image shown is representative of two independent experiments. Uncropped gel images are included in Source Data file.

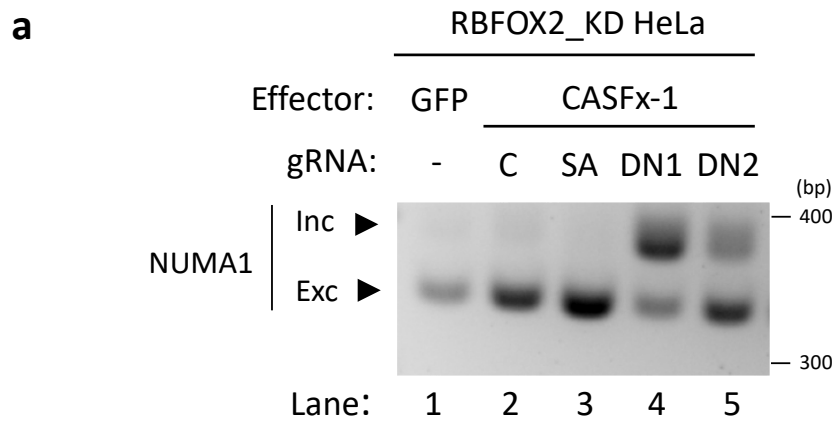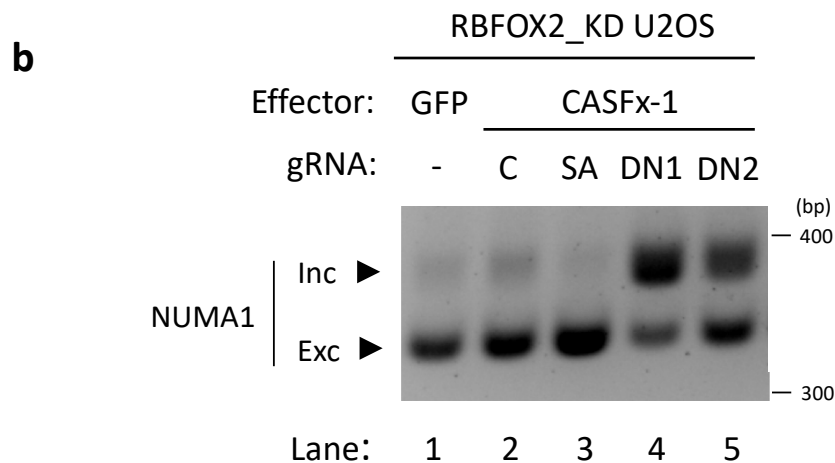

**Supplementary Fig 5.** Using CASFx-1 to activate cassette exon of *NUMA1*, a target of RBFOX1/2, in RBFOX2 knockdown (RBFOX2\_KD) HeLa and U2OS cells.

RBFOX2\_KD cells were transfected with *NUMA1* minigene, CASFx-1 (RBFOX1N-dCasRx-C) and indicated gRNAs. (a) Gel image of semi-quantitative splicing RT-PCR of the corresponding transfected samples in RBFOX2\_KD HeLa cells. “C” indicates a control gRNA without matching *NUMA1* minigene sequence. “SA” indicates a gRNA

targeting onto *NUMA1* exon. “DN1” and “DN2” represent two gRNAs targeting to downstream sequence of *NUMA1* exon. The image shown is representative of two independent experiments. (b) Gel image of semi-quantitative splicing RT-PCR of the corresponding transfected samples in RBFOX2\_KD U2OS cells. The image shown is representative of two independent experiments. Uncropped gel images are included in Source Data file.

**Supplementary Table 1.** Sequences of gRNAs used in this study

| Target site                                                                         | gRNA name      | gRNA sequence (5'-3')                                                                                                                                                                                                                                                                 |
|-------------------------------------------------------------------------------------|----------------|---------------------------------------------------------------------------------------------------------------------------------------------------------------------------------------------------------------------------------------------------------------------------------------|
| Non-target control                                                                  | Control        | AGCAGCAGCAGCAGCAGCAGCA                                                                                                                                                                                                                                                                |
| <i>SMN2</i> minigene downstream of exon 7                                           | SMN2-down1     | ACAAAAGTAAGATTCACITTTCA                                                                                                                                                                                                                                                               |
|                                                                                     | SMN2-down2     | GAGAATTCTAGTAGGGATGTAG                                                                                                                                                                                                                                                                |
|                                                                                     | SMN2-down3     | TTTCTTCCACACAACCAACCAG                                                                                                                                                                                                                                                                |
|                                                                                     | SMN2-down4     | GCTGGTCTGCCTACTAGTGATA                                                                                                                                                                                                                                                                |
| <i>SMN2</i> minigene exon 7                                                         | SMN2-EX        | AATGTGAGCACCTTCCTTCTTT                                                                                                                                                                                                                                                                |
| <i>RG6</i> minigene exon CX                                                         | RG6-SA         | ATATCGCCTGGATCCTGAGCCA                                                                                                                                                                                                                                                                |
| <i>SMN2</i> minigene downstream of exon 7                                           | SMN2-DN        | AACCCCTACCAACTGGTCGGGGTT<br>TGAAACACAAAAGTAAGATTCACTT<br>TCA CAAGTAAACCCCTACCAACTGG<br>TCGGGGTTTGA AACGAGAATTCTAG<br>TAGGGATGTAGCAAGTAAACCCCTA<br>CCA ACTGGTCGGGGTTTGA AACTTT<br>CTTCCACACAACCAACCAG (DR,<br>gRNA)                                                                    |
| <i>SMN2</i> minigene downstream of exon 7<br>and <i>RG6</i> minigene exon CX        | SMN2-DN-RG6-SA | AACCCCTACCAACTGGTCGGGGTT<br>TGAAACACAAAAGTAAGATTCACTT<br>TCA CAAGTAAACCCCTACCAACTGG<br>TCGGGGTTTGA AACGAGAATTCTAG<br>TAGGGATGTAGCAAGTAAACCCCTA<br>CCA ACTGGTCGGGGTTTGA AACTTT<br>CTTCCACACAACCAACCAGCAAGTA<br>AACCCCTACCAACTGGTCGGGGTT<br>TGAAACATATCGCCTGGATCCTGAG<br>CCA (DR, gRNA) |
| Endogenous <i>SMN2</i> downstream of<br>exon 7<br><br>(all-in-one RBFOX1N-dCasRx-C) | SMN2-down1_2_3 | AACCCCTACCAACTGGTCGGGGTT<br>TGAAACACAAAAGTAAGATTCACTT<br>TCA CAAGTAAACCCCTACCAACTGG<br>TCGGGGTTTGA AACGAGAATTCTAG<br>TAGGGATGTAGCAAGTAAACCCCTA<br>CCA ACTGGTCGGGGTTTGA AACTTT<br>CTTCCACACAACCAACCAG (DR,<br>gRNA)                                                                    |

|                                                                                             |                       |                                                                                                                                                                                                                                                                 |
|---------------------------------------------------------------------------------------------|-----------------------|-----------------------------------------------------------------------------------------------------------------------------------------------------------------------------------------------------------------------------------------------------------------|
| <p>Endogenous <i>SMN2</i> downstream of exon 7</p> <p>(all-in-one RBFOX1N-dPspCas13b-C)</p> | <p>SMN2-down4_5_6</p> | <p>GTAAGATTCAC<del>TTT</del>CATAATGCGTT<br/> GTGGAAGGTCCAGTTTTGAGGGGC<br/> TATTACAACGTAGGGATGTAGATTA<br/> AC<del>TTT</del>GTTGTGGAAGGTCCAGTTT<br/> TGAGGGGCTATTACAACGCTGGTC<br/> TGCCTACTAGTGATAGTTGTGGAAG<br/> GTCCAGTTTTGAGGGGCTATTACAA<br/> C (DR, gRNA)</p> |
| <p><i>NUMA1</i> minigene</p>                                                                | <p>NUMA1-down1</p>    | <p>CAGCCAGCATTAGCGAGGACC</p>                                                                                                                                                                                                                                    |
|                                                                                             | <p>NUMA1-down2</p>    | <p>GCCGGGCTCATGCACCAAGACT</p>                                                                                                                                                                                                                                   |
|                                                                                             | <p>NUMA1-SA</p>       | <p>AGCTGCTCCACCTGTACATGG</p>                                                                                                                                                                                                                                    |

**Supplementary Table 2.** List of PCR primers used in this study

| Target site     | Primer name | Primer sequence (5'-3')             | Experiment          |
|-----------------|-------------|-------------------------------------|---------------------|
| SMN2 minigene   | pCI-F       | GCTAACGCAGTCAGTGCTTC                | RT-PCR              |
|                 | pCI-R       | GTATCTTATCATGTCTGCTCG               |                     |
| RG6 minigene    | RG6-F       | ATGGATTACAAGGATGACGATGAC            | RT-PCR              |
|                 | RG6-R       | GCGCATGAACTCCTTGATGAC               |                     |
| Endogenous SMN2 | En-F        | ACCACCTCCCATATGTCCAG                | RT-PCR              |
|                 | En-R        | TTTTGAAGAAATGAGGCCAGTT              |                     |
| SMN2 minigene   | Vector-F    | GCTCTTAAGGCTAGAGTACTTAATACGA        | Quantitative RT-PCR |
|                 | Exclusion-R | CTTCTTTTTGATTTTGTCTAAAACCCATATAATAG |                     |
|                 | Inclusion-R | CTCTATGCCAGCATTTCATATAATAG          |                     |
| RG6 minigene    | Exclusion-F | CGGATCTAGAGGTCAGGAGGA               | Quantitative RT-PCR |
|                 | Inclusion-F | GAAGAATTCAGGTCAGGAGGA               |                     |
|                 | Vector-R    | GGTGTGTGGCCCTCGTAG                  |                     |
| Endogenous SMN2 | Endo-F      | ATAATTCCCCCACCACCTC                 | Quantitative RT-PCR |
|                 | Exclusion-R | CTTCTTTTTGATTTTGTCTAAAACCCATATAATAG |                     |
|                 | Inclusion-R | CTCTATGCCAGCATTTCATATAATAG          |                     |

**Supplementary Table 3.** Lists of off-target exon skipping (SE) events identified from RNA-seq of CASFx-1, CASFx-3 and ESF mix samples.

| CASFx-1 |       |        |           |           |           |            |          |                |
|---------|-------|--------|-----------|-----------|-----------|------------|----------|----------------|
| Gene    | chr   | strand | Exon      | Exon      | Upstream  | Downstream | FDR      | InclusionLevel |
| Symbol  |       |        | Start     | End       | ExonEnd   | ExonStart  |          | Difference     |
| AUP1    | chr2  | -      | 74528416  | 74528489  | 74528006  | 74529131   | 9.57E-05 | -0.583         |
| EP400   | chr12 | +      | 131981488 | 131981596 | 131979793 | 131982092  | 8.71E-04 | -0.271         |
| DNAAF5  | chr7  | +      | 729662    | 729847    | 727315    | 754588     | 1.08E-03 | -0.119         |
| EPHA2   | chr1  | -      | 16150895  | 16150963  | 16149047  | 16155847   | 5.41E-03 | -0.185         |

| CASFx-3 |      |        |          |          |          |            |          |                |
|---------|------|--------|----------|----------|----------|------------|----------|----------------|
| Gene    | chr  | strand | Exon     | Exon     | Upstream | Downstream | FDR      | InclusionLevel |
| Symbol  |      |        | Start    | End      | ExonEnd  | ExonStart  |          | Difference     |
| CTDSPL  | chr3 | +      | 37947056 | 37947211 | 37862278 | 37964570   | 8.91E-03 | -0.197         |
| RWDD3   | chr1 | +      | 95246541 | 95246657 | 95234315 | 95246755   | 8.16E-03 | 0.186          |

| ESF mix |       |        |           |           |           |            |          |                |
|---------|-------|--------|-----------|-----------|-----------|------------|----------|----------------|
| Gene    | chr   | strand | Exon      | Exon      | Upstream  | Downstream | FDR      | InclusionLevel |
| Symbol  |       |        | Start     | End       | ExonEnd   | ExonStart  |          | Difference     |
| TPM3    | chr1  | -      | 154171412 | 154171488 | 154170711 | 154172907  | 1.17E-07 | 0.728          |
| VDAC2   | chr10 | +      | 75217887  | 75217991  | 75212298  | 75219062   | 1.47E-05 | 0.55           |
| GUSB    | chr7  | -      | 65979398  | 65979541  | 65967907  | 65981973   | 5.65E-04 | 0.458          |
| PPP2R5B | chr11 | +      | 64925470  | 64925933  | 64925028  | 64927801   | 6.84E-07 | 0.403          |
| TMEM51  | chr1  | +      | 15210489  | 15210562  | 15153954  | 15214894   | 1.03E-03 | -0.361         |
| CCT6P1  | chr7  | +      | 65759174  | 65759271  | 65758317  | 65759859   | 3.95E-07 | 0.303          |
| ABI1    | chr10 | -      | 26759061  | 26759235  | 26751783  | 26765217   | 1.72E-07 | 0.283          |
| ABI1    | chr10 | -      | 26755654  | 26755741  | 26751783  | 26765217   | 2.91E-06 | 0.278          |
| SNHG12  | chr1  | -      | 28579911  | 28579981  | 28579587  | 28581589   | 4.04E-07 | 0.274          |

|          |       |   |           |           |           |           |          |        |
|----------|-------|---|-----------|-----------|-----------|-----------|----------|--------|
| DDB2     | chr11 | + | 47232813  | 47232959  | 47217049  | 47237836  | 5.55E-05 | 0.269  |
| GADD45A  | chr1  | + | 67686024  | 67686126  | 67685538  | 67687660  | 1.00E-08 | 0.268  |
| TIMM23B  | chr10 | + | 49945031  | 49945090  | 49942300  | 49952125  | 5.45E-03 | 0.268  |
| GUSB     | chr7  | - | 65976014  | 65976202  | 65967907  | 65981973  | 1.93E-04 | 0.26   |
| NRM      | chr6  | - | 30689275  | 30689452  | 30688942  | 30690841  | 5.36E-07 | 0.251  |
| ARHGEF11 | chr1  | - | 156938417 | 156938513 | 156937496 | 156939547 | 3.47E-04 | 0.246  |
| CROCCP2  | chr1  | - | 16626352  | 16626499  | 16626005  | 16627144  | 7.61E-04 | 0.24   |
| SNHG12   | chr1  | - | 28580559  | 28580646  | 28579981  | 28581589  | 4.55E-05 | 0.231  |
| NSUN5P1  | chr7  | + | 75412788  | 75412932  | 75410460  | 75414884  | 2.11E-03 | -0.221 |
| ABI1     | chr10 | - | 26759061  | 26759238  | 26751783  | 26765217  | 3.05E-07 | 0.22   |
| DDB2     | chr11 | + | 47234572  | 47234672  | 47232959  | 47235269  | 3.05E-07 | 0.205  |
| CTTN     | chr11 | + | 70421469  | 70421580  | 70420510  | 70422939  | 1.00E-08 | 0.201  |
| NSUN5P2  | chr7  | - | 72952151  | 72952295  | 72950196  | 72954624  | 2.29E-04 | -0.201 |
| FANCG    | chr9  | - | 35074370  | 35074494  | 35074216  | 35075278  | 1.00E-08 | 0.17   |
| FANCG    | chr9  | - | 35074926  | 35075082  | 35074216  | 35075278  | 1.00E-08 | 0.169  |
| TMEM180  | chr10 | + | 102470664 | 102471117 | 102470075 | 102471272 | 9.11E-06 | 0.165  |
| TSC22D4  | chr7  | - | 100477276 | 100477462 | 100474440 | 100478793 | 7.42E-04 | 0.158  |
| ILKAP    | chr2  | - | 238183652 | 238183740 | 238182186 | 238184019 | 1.00E-08 | 0.156  |
| PTS      | chr11 | + | 112230207 | 112230230 | 112228673 | 112233162 | 2.03E-05 | 0.156  |
| RAD54L   | chr1  | + | 46259963  | 46260099  | 46258746  | 46261260  | 1.58E-08 | 0.155  |
| TSC22D4  | chr7  | - | 100477276 | 100477459 | 100474440 | 100478793 | 4.17E-04 | 0.155  |
| SNHG12   | chr1  | - | 28581110  | 28581229  | 28579981  | 28581589  | 9.81E-06 | 0.152  |
| TBRG4    | chr7  | - | 45104537  | 45104709  | 45103443  | 45105440  | 2.32E-08 | 0.15   |
| ZNF316   | chr7  | + | 6637845   | 6638009   | 6637447   | 6639041   | 2.02E-03 | 0.15   |
| PI4KB    | chr1  | - | 151326171 | 151326373 | 151307801 | 151327270 | 5.48E-03 | 0.149  |
| NSUN5    | chr7  | - | 73308430  | 73308553  | 73305097  | 73308697  | 1.00E-08 | 0.142  |
| NRM      | chr6  | - | 30690024  | 30690243  | 30688942  | 30690841  | 3.14E-04 | 0.142  |



|         |       |   |           |           |           |           |          |        |
|---------|-------|---|-----------|-----------|-----------|-----------|----------|--------|
| PTS     | chr11 | + | 112230625 | 112230682 | 112228673 | 112233162 | 9.81E-06 | 0.14   |
| TBCE    | chr1  | + | 235419416 | 235419561 | 235414618 | 235427139 | 2.34E-03 | 0.139  |
| TBRG4   | chr7  | - | 45104098  | 45104256  | 45103443  | 45105440  | 3.05E-07 | 0.137  |
| VAR5    | chr6  | - | 31782284  | 31782443  | 31782177  | 31782720  | 1.00E-08 | 0.135  |
| TSC22D4 | chr7  | - | 100477276 | 100478204 | 100474440 | 100478793 | 1.43E-04 | 0.133  |
| SLMAP   | chr3  | + | 57925844  | 57925934  | 57923023  | 57927295  | 2.22E-04 | 0.133  |
| PXDC1   | chr6  | - | 3727550   | 3727662   | 3723736   | 3737078   | 2.10E-04 | -0.129 |
| ODF2    | chr9  | + | 128460549 | 128460666 | 128459657 | 128460941 | 7.74E-04 | 0.128  |
| FYN     | chr6  | - | 111699514 | 111699670 | 111696456 | 111702884 | 9.31E-04 | 0.128  |
| NRM     | chr6  | - | 30690046  | 30690243  | 30688942  | 30690841  | 4.64E-04 | 0.127  |
| TSC22D4 | chr7  | - | 100477276 | 100478307 | 100474440 | 100478793 | 1.57E-04 | 0.122  |
| RAD54L  | chr1  | + | 46260726  | 46261015  | 46258746  | 46261260  | 2.52E-08 | 0.121  |
| GADD45A | chr1  | + | 67686349  | 67686587  | 67685538  | 67687660  | 1.00E-08 | 0.115  |
| RIT1    | chr1  | - | 155910655 | 155910804 | 155910506 | 155911242 | 1.30E-03 | 0.115  |
| EIF2D   | chr1  | - | 206599462 | 206599612 | 206599092 | 206600262 | 1.25E-05 | 0.111  |
| FGFR1OP | chr6  | + | 167003722 | 167003811 | 167003247 | 167004263 | 9.05E-03 | 0.111  |
| ALAS1   | chr3  | + | 52208082  | 52208247  | 52206751  | 52211282  | 1.02E-08 | 0.109  |
| TRIM11  | chr1  | - | 228400963 | 228401194 | 228397165 | 228402065 | 1.52E-04 | 0.105  |
| EIF2D   | chr1  | - | 206599732 | 206599836 | 206599092 | 206600262 | 9.81E-06 | 0.104  |
| NOP16   | chr5  | - | 176386839 | 176386909 | 176385327 | 176388432 | 5.67E-04 | 0.103  |
| SARS    | chr1  | + | 109230877 | 109231021 | 109229572 | 109231630 | 1.00E-08 | 0.102  |
| RETSAT  | chr2  | - | 85351679  | 85351862  | 85351021  | 85354335  | 3.72E-08 | 0.101  |
| POLH    | chr6  | + | 43582315  | 43582456  | 43576440  | 43583006  | 3.65E-03 | 0.101  |
